# Supplementary figures and images for: Finagle’s laws of information: lessons learnt evaluating a complex health intervention in Nigeria
Source: HighWire-hosted journal article supplement (doi:10.1136/bmjgh-2022-010938), 2023-03-01

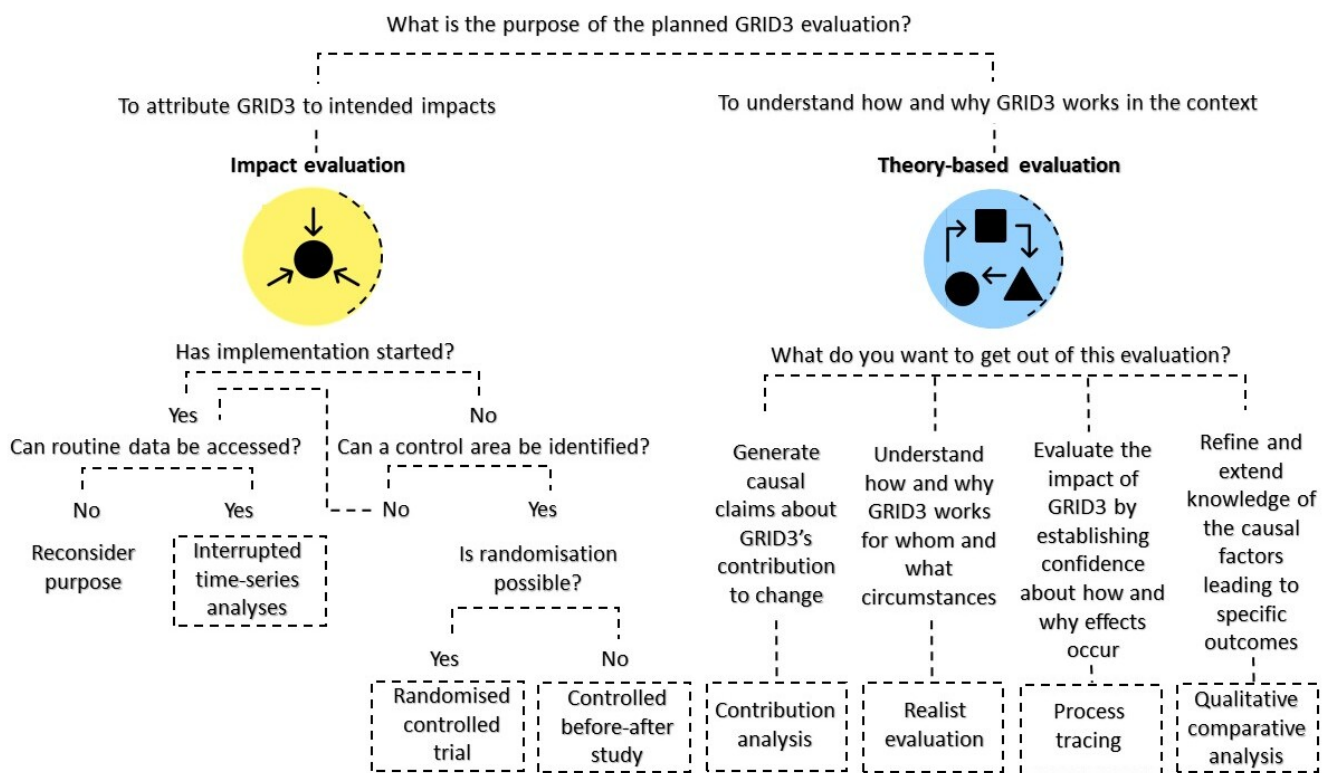

Supplement: bmjgh-2022-010938supp002_data_supplement.pdf [file bmjgh-2022-010938supp002_data_supplement.pdf]
